# Supplementary material
Source: PubMed Central journal article supplement (PMC10081510)
Supplement: NIHMS1882298-supplement-Supporting_Documents.pdf [file NIHMS1882298-supplement-Supporting_Documents.pdf]

## Supporting Information

### Discovery of Potent Orally Bioavailable WD Repeat Domain 5 (WDR5) Inhibitors Using a Pharmacophore-Based Optimization

Kevin B. Teuscher,<sup>1</sup> Kenneth M. Meyers,<sup>1</sup> Qiangqiang Wei,<sup>1</sup> Jonathan J. Mills,<sup>1</sup> Jianhua Tian,<sup>4</sup> Joseph Alvarado,<sup>1</sup> Jiqing Sai,<sup>1</sup> Mayme Van Meveren,<sup>1</sup> Taylor M. South,<sup>1</sup> Tyson A. Rietz,<sup>1</sup> Bin Zhao,<sup>1</sup> William J. Moore,<sup>6</sup> Gordon M. Stott,<sup>6</sup> William P. Tansey,<sup>1,2</sup> Taekyu Lee,<sup>1</sup> and Stephen W. Fesik<sup>1,3,5\*</sup>

<sup>1</sup>Department of Biochemistry, <sup>2</sup>Department of Cell and Developmental Biology, and  
<sup>3</sup>Department of Pharmacology, Vanderbilt University School of Medicine, Nashville, Tennessee 37232-0146, United States

<sup>4</sup> Molecular Design and Synthesis Center, Vanderbilt Institute of Chemical Biology, and  
<sup>5</sup>Department of Chemistry, Vanderbilt University, Nashville, Tennessee 37232-0142, United States

<sup>6</sup>Leidos Biomedical Research, Frederick National Laboratory for Cancer Research, Frederick, Maryland 21701-4907, United States

\*To whom correspondence should be addressed: [stephen.fesik@vanderbilt.edu](mailto:stephen.fesik@vanderbilt.edu)

Vanderbilt University, Nashville, TN 37232, Phone: (615)-322-6303

#### SI Contents:

#### Compound Synthesis

Scheme S1. Synthesis of 58 S2

Scheme S2. Synthesis of S18 – S19 S4

#### X-ray Data Collection and Refinement Statistics

Table S1. X-ray Data Collection and Refinement Statistics for 20 and 37 S12

#### LCMS Traces

Figure S1 – S7. For 1, 34, 36, 37, 38, 40, and 41 S13 – S19

Reference S20

## Scheme S1.<sup>a</sup> Synthesis of 58

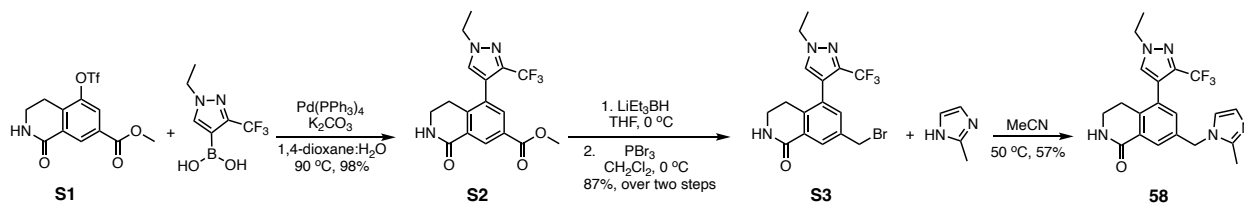

<sup>a</sup>Compound **S1** was synthesized according to the previously reported procedure.<sup>1</sup>

### Methyl

**5-(1-ethyl-3-(trifluoromethyl)-1H-pyrazol-4-yl)-1-oxo-1,2,3,4-tetrahydroisoquinoline-7-carboxylate (**S2**).** Compound **S1** (2.0 g, 5.7 mmol, 1 equiv), (1-ethyl-3-(trifluoromethyl)-1H-pyrazol-4-yl)boronic acid (1.3 g, 6.2 mmol, 1.1 equiv), K<sub>2</sub>CO<sub>3</sub> (1.96 g, 14.2 mmol, 2.5 equiv), and tetrakis(triphenylphosphine)palladium(0) (196 mg, 0.17 mmol, 0.03 equiv), were dissolved in 1,4-dioxane/H<sub>2</sub>O (25 mL, 4:1). The reaction mixture was placed under an argon atmosphere, heated to 80 °C for 14 h, and then cooled to room temperature. The reaction mixture was diluted with water and extracted with EtOAc. The combined organic layers were washed with brine, dried over MgSO<sub>4</sub>, filtered, and concentrated under reduced pressure. The residue was purified by flash chromatography (Combi-flash Rf, EtOAc/hexanes = 0–100% gradient) to obtain the title compound (2.6 g, 5.7 mmol, 98% yield). LCMS (method 2, ESI): *m/z* = 368.0 [M + H]<sup>+</sup>.

**7-(Bromomethyl)-5-(1-ethyl-3-(trifluoromethyl)-1H-pyrazol-4-yl)-3,4-dihydroisoquinolin-1(2H)-one (**S3**).** A solution of lithium triethylborohydride (1 M THF, 17 mL, 17.2 mmol, 3 equiv) was added dropwise to a solution of **S2** (2.1 g, 5.7 mmol, 1 equiv) in THF at 0 °C. The reaction was stirred for 40 min, then quenched with saturated aqueous NaHCO<sub>3</sub>. The mixture was extracted with EtOAc. The combined organic layers were dried over MgSO<sub>4</sub> and concentrated under reduced pressure. The resulting benzyl alcohol was used without further purification. LCMS (method 2, ESI): *m/z* = 340.0 [M + H]<sup>+</sup>. PBr<sub>3</sub> (1.0 mL, 11.4 mmol, 2 equiv) was added to a solution of the

benzyl alcohol (1 equiv) in CH<sub>2</sub>Cl<sub>2</sub> at 0 °C. The reaction was stirred and slowly warmed to room temperature. Saturated aqueous NaHCO<sub>3</sub> was added and the mixture was extracted with CH<sub>2</sub>Cl<sub>2</sub>. The combined organic layers were dried over MgSO<sub>4</sub> and concentrated under reduced pressure. The title compound was used without further purification (2.0 g, 5.7 mmol, 87% yield, 2 steps). LCMS (method 2, ESI):  $m/z$  = 402.9 [M + H]<sup>+</sup>.

**5-(1-Ethyl-3-(trifluoromethyl)-1*H*-pyrazol-4-yl)-7-((2-methyl-1*H*-imidazol-1-yl)methyl)-3,4-dihydroisoquinolin-1(2*H*)-one (58).** 2-Methyl-1*H*-imidazole (557 mg, 6.8 mmol, 3 equiv) was added to a solution of **S3** (909 mg, 2.3 mmol, 1 equiv) in acetonitrile (15 mL) at 23 °C. The reaction mixture was stirred for 12 h at 50 °C, then cooled to ambient temperature, filtered and concentrated. The residue was purified by preparative reversed-phase HPLC (Phenomenex Gemini C18, MeCN/H<sub>2</sub>O = 15–95% gradient, 0.1% TFA) followed by neutralization with saturated aqueous NaHCO<sub>3</sub> to obtain the title compound (522 mg, 1.3 mmol, 57% yield). <sup>1</sup>H NMR (400 MHz, CDCl<sub>3</sub>) δ 8.01 (d,  $J$  = 2.1 Hz, 1H), 7.34 (d,  $J$  = 1.1 Hz, 1H), 6.96 (d,  $J$  = 2.0 Hz, 1H), 6.94 (d,  $J$  = 1.4 Hz, 1H), 6.85 (d,  $J$  = 1.4 Hz, 1H), 5.97 (s, 1H), 5.09 (s, 2H), 4.26 (q,  $J$  = 7.3 Hz, 2H), 3.48 (td,  $J$  = 6.5, 2.8 Hz, 2H), 2.78 (t,  $J$  = 6.5 Hz, 2H), 2.34 (s, 3H), 1.58 (t,  $J$  = 7.3 Hz, 3H); LCMS (method 2, ESI):  $m/z$  = 404.0 [M + H]<sup>+</sup>.

## Scheme S2. Synthesis of S18 – S19

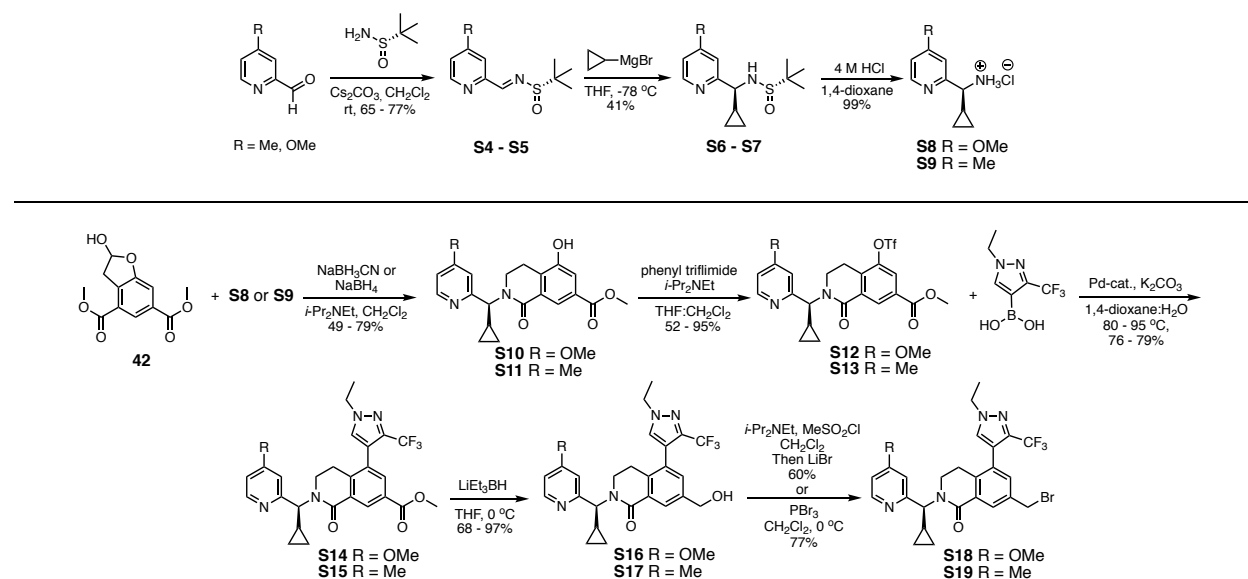

**(S,E)-N-((4-Methoxypyridin-2-yl)methylene)-2-methylpropane-2-sulfinamide (S4).** Cesium carbonate (1.0 g, 3.1 mmol 1.5 equiv) was added to a solution of (S)-2-methylpropane-2-sulfinamide (0.28 g, 2.1 mmol, 1 equiv) and 4-methoxypicolinaldehyde (0.25 g, 2.1 mmol, 1 equiv) in  $\text{CH}_2\text{Cl}_2$  (10 mL). The reaction was stirred at rt for 16 h, and then filtered through celite and concentrated under reduced pressure. The residue was purified by flash chromatography (Combi-flash Rf, EtOAc/hexanes = 5–75% gradient) to obtain the title compound (0.38 g, 1.60 mmol, 77% yield).  $^1\text{H}$  NMR (400 MHz,  $\text{CDCl}_3$ )  $\delta$  8.68 (s, 1H), 8.58 (d,  $J$  = 5.8 Hz, 1H), 7.55 (d,  $J$  = 2.6 Hz, 1H), 6.94 (dd,  $J$  = 5.8, 2.6 Hz, 1H), 3.94 (s, 3H), 1.31 (s, 9H); LCMS (method 2, ESI):  $R_t$  = 0.85 min,  $m/z$  = 241.2  $[\text{M} + \text{H}]^+$ .

**(S,E)-2-Methyl-N-((4-methylpyridin-2-yl)methylene)propane-2-sulfinamide (S5).** Cesium carbonate (7.13 g, 21.9 mmol, 1.5 equiv) was added to a solution of (R)-2-methylpropane-2-sulfinamide (2.2 g, 18.2 mmol, 1.1 equiv) and 4-methoxypicolinaldehyde (2.0 g, 16.5 mmol, 1 equiv) in  $\text{CH}_2\text{Cl}_2$  (200 mL). The reaction was stirred at rt for 16 h, and then filtered through celite

and concentrated under reduced pressure. The residue was purified by flash chromatography (Combi-flash Rf, EtOAc/hexanes = 5–75% gradient) to obtain the title compound (3.7 g, 16.0 mmol, quant.). LCMS (method 2, ESI):  $R_t$  = 1.301 min,  $m/z$  = 225.1  $[M + H]^+$ .

**(S)-N-((S)-Cyclopropyl(4-methoxypyridin-2-yl)methyl)-2-methylpropane-2-sulfonamide**

**(S6).** A 1.0 M solution of cyclopropyl magnesium bromide in 2-methyltetrahydrofuran (3.2 mL, 3.2 mmol, 2.0 equiv) was added dropwise to a solution of **S4** (0.38 g, 1.6 mmol, 1 equiv) in THF (10 mL) at -78°C. After 30 min, the reaction was quenched with saturated aqueous  $\text{NH}_4\text{Cl}$  (30 mL), stirred for 30 min, and then filtered. The filtrate was extracted with EtOAc, the combined organic layers were dried with  $\text{MgSO}_4$ , filtered, and concentrated under reduced pressure. The major diastereomer was isolated by preparative reversed-phase HPLC (Phenomenex Gemini C18, MeCN:H<sub>2</sub>O = 5–30%, 0.1% TFA) to afford the title compound (0.15 g, 0.53 mmol, 33% yield). <sup>1</sup>H NMR (400 MHz, CDCl<sub>3</sub>)  $\delta$  8.38 (d,  $J$  = 5.8 Hz, 1H), 6.81 (d,  $J$  = 2.6 Hz, 1H), 6.72 (dd,  $J$  = 5.8, 2.6 Hz, 1H), 4.11 (d,  $J$  = 4.4 Hz, 1H), 3.84 (s, 3H), 3.64 (dd,  $J$  = 9.1, 4.4 Hz, 1H), 1.35–1.22 (m, 1H), 1.20 (s, 9H), 0.74–0.68 (m, 1H), 0.58–0.44 (m, 3H); LCMS (method 2, ESI):  $R_t$  = 0.95 min,  $m/z$  = 283.2  $[M + H]^+$ .

**(S)-N-((S)-Cyclopropyl(4-methylpyridin-2-yl)methyl)-2-methylpropane-2-sulfonamide (S7).**

A 3.4 M solution of cyclopropyl magnesium bromide in 2-methyltetrahydrofuran (7.4 mL, 25.1 mmol, 1.5 equiv) was added dropwise to a solution of **S5** (3.75 g, 16.7 mmol, 1 equiv) in THF (10 mL) at -78°C. After 30 min, the reaction was quenched with saturated aqueous  $\text{NH}_4\text{Cl}$  (30 mL), stirred for 30 min, and then filtered. The filtrate was extracted with EtOAc, the combined organic layers were dried with  $\text{MgSO}_4$ , filtered, and concentrated under reduced pressure. The major diastereomer was isolated by flash chromatography (Combi-flash Rf, EtOAc/hexanes = 0–100% gradient) to afford the title compound (1.82 g, 6.83 mmol, 41% yield). <sup>1</sup>H NMR (400 MHz, CDCl<sub>3</sub>)

$\delta$  8.39 (d,  $J$  = 5.0 Hz, 1H), 7.15 (s, 1H), 7.00 (d,  $J$  = 4.9 Hz, 1H), 5.00 (d,  $J$  = 4.9 Hz, 1H), 3.80 (dd,  $J$  = 8.2, 5.1 Hz, 1H), 2.35 (s, 3H), 1.27 (s, 9H), 1.18–1.12 (m, 1H), 0.64–0.59 (m, 1H), 0.58–0.50 (m, 2H), 0.45–0.38 (m, 1H); LCMS (method 2, ESI):  $R_t$  = 1.023 min,  $m/z$  = 267.1  $[M + H]^+$ .

**(S)-Cyclopropyl(4-methoxypyridin-2-yl)methanamine hydrochloride (S8).** A 4.0 M solution of HCl in 1,4-dioxane (1.33 mL, 5.3 mmol, 10 equiv) was added to a solution of **S6** (0.15 g, 0.53 mmol, 1 equiv) in MeOH (4 mL). The reaction was stirred at room temperature for 2 h and followed by TLC. The reaction mixture was concentrated under reduced pressure to provide the title compound (0.11 g, 0.526 mmol, 99% yield), which was used without further purification.  $^1\text{H}$  NMR (400 MHz,  $\text{CD}_3\text{OD}$ )  $\delta$  8.73 (d,  $J$  = 5.8 Hz, 1H), 7.86 (d,  $J$  = 2.6 Hz, 1H), 7.60 (dd,  $J$  = 5.8, 2.6 Hz, 1H), 4.23 (s, 3H), 4.06 (d,  $J$  = 10.6 Hz, 1H), 1.62–1.53 (m, 1H), 1.03–0.95 (m, 1H), 0.84–0.77 (m, 2H), 0.75–0.68 (m, 1H); LCMS (method 2, ESI):  $R_t$  = 0.45 min,  $m/z$  = 179.2  $[M + H]^+$ .

**(S)-Cyclopropyl(4-methylpyridin-2-yl)methanamine hydrochloride (S9).** A 4.0 M solution of HCl in 1,4-dioxane (17 mL, 68.3 mmol, 10 equiv) was added to a solution of **S7** (1.82 g, 6.83 mmol, 1 equiv) in THF (50 mL). The reaction was stirred at rt for 2 h and followed by TLC. The reaction mixture was concentrated under reduced pressure to provide the title compound (1.33 g, 6.7 mmol, 99% yield), which was used without further purification. LCMS (method 2, ESI):  $R_t$  = 0.579 min,  $m/z$  = 163.2  $[M + H]^+$ .

**Methyl (S)-2-(cyclopropyl(4-methoxypyridin-2-yl)methyl)-5-hydroxy-1-oxo-1,2,3,4-tetrahydroisoquinoline-7-carboxylate (S10).** Dimethyl 2-hydroxy-2,3-dihydrobenzofuran-4,6-dicarboxylate **42** (1.9 g, 7.6 mmol, 1 equiv), **S8** (2.5 g, 9.9 mmol, 1.3 equiv), and *N,N*-diisopropylethylamine (4.0 mL, 22.8 mmol, 3 equiv) were dissolved in  $\text{CH}_2\text{Cl}_2$  and stirred at 30  $^\circ\text{C}$  for 30 min. Then sodium cyanoborohydride (1.4 g, 22.9 mmol, 3 equiv) was added and the reaction was stirred at 30  $^\circ\text{C}$  for 3 h. The reaction mixture was concentrated and dissolved in 1,4-

dioxane and heated at 110 °C overnight. Saturated aqueous NaHCO<sub>3</sub> was added and the mixture was extracted with CH<sub>2</sub>Cl<sub>2</sub>. The combined organic phases were dried over anhydrous Na<sub>2</sub>SO<sub>4</sub> and concentrated under reduced pressure. The title compound (2.30 g, 6.0 mmol, 79% yield) was used without further purification. LCMS (method 2, ESI): *R*<sub>t</sub> = 1.14 min, *m/z* = 383.1 [M + H]<sup>+</sup>.

**Methyl (S)-2-(cyclopropyl(4-methylpyridin-2-yl)methyl)-5-hydroxy-1-oxo-1,2,3,4-tetrahydroisoquinoline-7-carboxylate (S11).** Dimethyl 2-hydroxy-2,3-dihydrobenzofuran-4,6-dicarboxylate **42** (3.4 g, 13.5 mmol, 1 equiv), **S9** (2.84 g, 17.5 mmol, 1.3 equiv), and *N,N*-diisopropylethylamine (7 mL, 40.6 mmol, 3 equiv) were dissolved in CH<sub>2</sub>Cl<sub>2</sub> and stirred at 30 °C for 30 min. Then sodium borohydride (0.81 g, 30.5 mmol, 2.5 equiv) was added and the reaction was stirred at 30 °C for 3 h. The reaction mixture was concentrated and dissolved in 1,4-dioxane and heated at 110 °C overnight. Saturated aqueous NaHCO<sub>3</sub> was added and the mixture was extracted with CH<sub>2</sub>Cl<sub>2</sub>. The combined organic phases were dried over anhydrous Na<sub>2</sub>SO<sub>4</sub> and concentrated under reduced pressure. The title compound (2.44 g, 6.7 mmol, 49% yield) was used without further purification. <sup>1</sup>H NMR (400 MHz, CDCl<sub>3</sub>) δ 8.43 (d, *J* = 5.1 Hz, 1H), 8.28 (s, 1H), 7.58 (s, 1H), 7.29 (s, 1H), 7.02 (d, *J* = 4.3 Hz, 1H), 5.08 (d, *J* = 10.1 Hz, 1H), 3.85 (s, 3H), 3.73–3.64 (m, 2H), 3.03–2.95 (m, 1H), 2.92–2.84 (m, 1H), 2.33 (s, 3H), 1.22–1.18 (m, 1H), 0.81–0.75 (m, 1H), 0.66–0.60 (m, 1H), 0.56–0.49 (m, 2H); LCMS (method 2, ESI): *R*<sub>t</sub> = 1.137 min, *m/z* = 367.0 [M + H]<sup>+</sup>.

**Methyl (S)-2-(cyclopropyl(4-methoxypyridin-2-yl)methyl)-1-oxo-5-(((trifluoromethyl)sulfonyl)oxy)-1,2,3,4-tetrahydroisoquinoline-7-carboxylate (S12).** Phenyl triflimide (3.2 g, 9.0 mmol, 1.5 equiv) was added to a solution of **S10** (2.3 g, 6.0 mmol, 1 equiv) and triethylamine (2.5 mL, 18 mmol, 3 equiv) in THF/CH<sub>2</sub>Cl<sub>2</sub> (5:1) at 23 °C and stirred for 14 h. Saturated aqueous NaHCO<sub>3</sub> was added and the mixture was extracted with CH<sub>2</sub>Cl<sub>2</sub>. The combined

organic phases were dried over anhydrous Na<sub>2</sub>SO<sub>4</sub> and concentrated under reduced pressure. The residue was purified by flash chromatography (Combi-flash Rf, EtOAc/hexanes = 0–50% gradient) to obtain the title compound (2.9 g, 5.7 mmol, 95% yield). LCMS (method 2, ESI): *R*<sub>t</sub> = 1.48 min, *m/z* = 514.9 [M + H]<sup>+</sup>.

**Methyl (S)-2-(cyclopropyl(4-methylpyridin-2-yl)methyl)-1-oxo-5-(((trifluoromethyl)sulfonyl)oxy)-1,2,3,4-tetrahydroisoquinoline-7-carboxylate (S13).** Phenyl triflimide (2.8 g, 7.9 mmol, 1.2 equiv) was added to a solution of **S11** (2.4 g, 6.6 mmol, 1 equiv) and triethylamine (2.3 mL, 16.4 mmol, 2.5 equiv) in THF/CH<sub>2</sub>Cl<sub>2</sub> (5:1) at 23 °C and stirred for 14 h. Saturated aqueous NaHCO<sub>3</sub> was added and the mixture was extracted with CH<sub>2</sub>Cl<sub>2</sub>. The combined organic phases were dried over anhydrous Na<sub>2</sub>SO<sub>4</sub> and concentrated under reduced pressure. The residue was purified by flash chromatography (Combi-flash Rf, EtOAc/hexanes = 0–100% gradient) to obtain the title compound (1.7 g, 3.4 mmol, 52% yield). LCMS (method 2, ESI): *R*<sub>t</sub> = 1.636 min, *m/z* = 498.9 [M + H]<sup>+</sup>.

**Methyl (S)-2-(cyclopropyl(4-methoxypyridin-2-yl)methyl)-5-(1-ethyl-3-(trifluoromethyl)-1H-pyrazol-4-yl)-1-oxo-1,2,3,4-tetrahydroisoquinoline-7-carboxylate (S14).** Compound **S12** (2.0 g, 3.9 mmol, 1 equiv), (1-ethyl-3-(trifluoromethyl)-1H-pyrazol-4-yl)boronic acid (0.97 g, 4.68 mmol, 1.2 equiv), potassium carbonate (1.3 g, 9.7 mmol, 2.5 equiv), and tetrakis(triphenylphosphine)palladium(0) (224 mg, 0.19 mmol, 0.05 equiv), were dissolved in 1,4-dioxane/H<sub>2</sub>O (4:1). The reaction mixture was placed under an argon atmosphere, heated to 80 °C for 14 h, and then cooled to room temperature. The reaction mixture was diluted with water and extracted with CH<sub>2</sub>Cl<sub>2</sub>. The combined organic layers were washed with brine, dried over MgSO<sub>4</sub>, filtered, and concentrated under reduced pressure. The residue was purified by flash chromatography (Combi-flash Rf, EtOAc/hexanes = 0–100% gradient) to obtain the title

compound (1.6 g, 3.1 mmol, 79% yield). <sup>1</sup>H NMR (400 MHz, CDCl<sub>3</sub>) δ 8.77 (d, *J* = 1.8 Hz, 1H), 8.37 (d, *J* = 5.7 Hz, 1H), 8.0 (d, *J* = 1.8 Hz, 1H), 7.38 (s, 1H), 6.98 (d, *J* = 2.5 Hz, 1H), 6.72 (dd, *J* = 5.7, 2.5 Hz, 1H), 5.06 (d, *J* = 10.0 Hz, 1H), 4.26 (q, *J* = 7.3 Hz, 2H), 3.91 (s, 3H), 3.84 (s, 3H), 3.76–3.68 (m, 2H), 2.82–2.72 (m, 2H), 1.68–1.61 (m, 1H), 1.56 (t, *J* = 7.3 Hz, 3H), 0.80–0.75 (m, 1H), 0.64–0.59 (m, 1H), 0.55–0.48 (m, 2H); LCMS (method 2, ESI): *R*<sub>t</sub> = 1.47 min, *m/z* = 529.0 [M + H]<sup>+</sup>.

**Methyl (S)-2-(cyclopropyl(4-methylpyridin-2-yl)methyl)-5-(1-ethyl-3-(trifluoromethyl)-1*H*-pyrazol-4-yl)-1-oxo-1,2,3,4-tetrahydroisoquinoline-7-carboxylate (S15).** Compound S13 (1.7 g, 3.4 mmol, 1 equiv), (1-ethyl-3-(trifluoromethyl)-1*H*-pyrazol-4-yl)boronic acid (0.92 g, 4.4 mmol, 1.3 equiv), potassium carbonate (1.4 g, 10.2 mmol, 3 equiv), and PdCl<sub>2</sub>(dppf) (125 mg, 0.17 mmol, 0.05 equiv), were dissolved in 1,4-dioxane/H<sub>2</sub>O (3:1). The reaction mixture was placed under an argon atmosphere, heated to 95 °C for 2 h, and then cooled to room temperature. The reaction mixture was diluted with water and extracted with CH<sub>2</sub>Cl<sub>2</sub>. The combined organic layers were washed with brine, dried over MgSO<sub>4</sub>, filtered, and concentrated under reduced pressure. The residue was purified by flash chromatography (Combi-flash Rf, EtOAc/hexanes = 3:1 isocratic) to obtain the title compound (1.3 g, 2.6 mmol, 76% yield). LCMS (method 2, ESI): *R*<sub>t</sub> = 1.595 min, *m/z* = 513.0 [M + H]<sup>+</sup>.

**(S)-2-(Cyclopropyl(4-methoxypyridin-2-yl)methyl)-5-(1-ethyl-3-(trifluoromethyl)-1*H*-pyrazol-4-yl)-7-(hydroxymethyl)-3,4-dihydroisoquinolin-1(2*H*)-one (S16).** A solution of lithium triethylborohydride (1 M THF, 13.2 mL, 13.2 mmol, 3 equiv) was added dropwise to a solution of S14 (2.3 g, 4.4 mmol, 1 equiv) in THF at 0 °C. The reaction was stirred for 40 min, then quenched with saturated aqueous NaHCO<sub>3</sub>. The mixture was extracted with EtOAc. The combined organic layers were dried over MgSO<sub>4</sub>, concentrated, and concentrated under reduced

pressure. The residue was purified by flash chromatography (Combi-flash Rf, EtOAc/hexanes = 0–100% gradient) to obtain the title compound (1.5 g, 3.0 mmol, 68% yield). LCMS (method 2, ESI):  $R_t$  = 1.29 min,  $m/z$  = 501.0  $[M + H]^+$ .

**(S)-2-(Cyclopropyl(4-methylpyridin-2-yl)methyl)-5-(1-ethyl-3-(trifluoromethyl)-1H-pyrazol-4-yl)-7-(hydroxymethyl)-3,4-dihydroisoquinolin-1(2H)-one (S17).** Sodium borohydride (1.10 g, 29.1 mmol, 20 equiv) was added to a solution of **S15** (1.3 g, 2.54 mmol, 1 equiv) in EtOH. The reaction was refluxed for 5 h, then cooled and quenched with saturated aqueous  $\text{NaHCO}_3$ . The mixture was extracted with EtOAc. The combined organic layers were dried over  $\text{MgSO}_4$  and concentrated under reduced pressure. The residue was purified by flash chromatography (Combi-flash Rf, EtOAc/hexanes = 0–100% gradient) to obtain the title compound (1.2 g, 2.46 mmol, 97% yield). LCMS (method 2, ESI):  $R_t$  = 1.329 min,  $m/z$  = 485.1  $[M + H]^+$ .

**(S)-7-(Bromomethyl)-2-(cyclopropyl(4-methoxypyridin-2-yl)methyl)-5-(1-ethyl-3-(trifluoromethyl)-1H-pyrazol-4-yl)-3,4-dihydroisoquinolin-1(2H)-one (S18).** A solution of **S16** (0.59 g, 1.2 mmol, 1 equiv) in  $\text{CH}_2\text{Cl}_2$  (12 mL) was cooled in an ice bath. *N,N*-Diisopropylethylamine (0.4 mL, 2.4 mmol, 2 equiv) and methanesulfonyl chloride (0.14 mL, 1.8 mmol, 1.5 equiv) were added and the reaction was stirred for 1 h. The reaction was diluted with saturated aqueous  $\text{NaHCO}_3$  and the layers were separated. The organic layer was dried over  $\text{MgSO}_4$  and concentrated under reduced pressure. This material was dissolved in THF (8 mL). Lithium bromide (0.26 g, 3.0 mmol, 2.5 equiv) was added and reaction mixture was refluxed for 1 h. The reaction was concentrated under reduced pressure and the crude product was diluted with EtOAc and washed with water. The organic layer was dried over  $\text{MgSO}_4$  and concentrated under reduced pressure. The residue was purified by flash chromatography (Combi-flash Rf,

EtOAc/hexanes = 0–100% gradient) to obtain the title compound (0.4 g, 0.71 mmol, 60% yield).

<sup>1</sup>H NMR (400 MHz, CDCl<sub>3</sub>) δ 8.37 (d, *J* = 5.7 Hz, 1H), 8.15 (d, *J* = 1.9 Hz, 1H), 7.38 (d, *J* = 5.9 Hz, 1H), 7.37 (s, 1H), 6.97 (d, *J* = 2.4 Hz, 1H), 6.72 (dd, *J* = 5.7, 2.4 Hz, 1H), 5.04 (d, *J* = 10.0 Hz, 1H), 4.50 (s, 2H), 4.26 (q, *J* = 7.3 Hz, 2H), 3.84 (s, 3H), 3.76–3.63 (m, 2H), 2.77–2.64 (m, 2H), 1.68–1.61 (m, 1H), 1.56 (t, *J* = 7.3 Hz, 3H), 0.78–0.75 (m, 1H), 0.64–0.59 (m, 1H), 0.55–0.48 (m, 2H); LCMS (method 2, ESI): *R*<sub>t</sub> = 1.55 min, *m/z* = 562.9 [M + H]<sup>+</sup>.

**(*S*)-7-(Bromomethyl)-2-(cyclopropyl(4-methylpyridin-2-yl)methyl)-5-(1-ethyl-3-(trifluoromethyl)-1*H*-pyrazol-4-yl)-3,4-dihydroisoquinolin-1(2*H*)-one (S19).** PBr<sub>3</sub> (0.7 mL, 0.74 mmol, 3 equiv) was added to a solution of **S17** (1.2 g, 2.48 mmol, 1 equiv) in CH<sub>2</sub>Cl<sub>2</sub> at 0 °C. The reaction was stirred and slowly warmed to room temperature. Saturated aqueous NaHCO<sub>3</sub> was added and the mixture was extracted with CH<sub>2</sub>Cl<sub>2</sub>. The combined organic layers were dried over MgSO<sub>4</sub> and concentrated under reduced pressure. The title compound (1.05 g, 1.9 mmol, 77% yield) was used without further purification. LCMS (method 2, ESI): *R*<sub>t</sub> = 1.656 min, *m/z* = 546.9 [M + H]<sup>+</sup>.

**Table S1. X-ray Data Collection and Refinement Statistics for 20 and 37**

| Compound                              | <b>20</b>                  | <b>37</b>                  |
|---------------------------------------|----------------------------|----------------------------|
| PDB Accession Code                    | 7U9Y                       | 7UAS                       |
| <b>Data Collection</b>                |                            |                            |
| Space group                           | P 21 21 2                  | P1                         |
| Cell dimensions                       |                            |                            |
| a, b, c (Å)                           | 81.259, 86.122, 41.094     | 46.743, 53.857, 64.519     |
| $\alpha$ , $\beta$ , $\gamma$ (°)     | 90, 90, 90                 | 107.96, 91.31, 109.39      |
| Resolution (Å)                        | 29.55 – 1.90 (1.93 – 1.90) | 28.43 – 1.81 (1.85 – 1.81) |
| Rmerge (%)                            | 9.9 (61.8)                 | 6.5 (25.2)                 |
| Mean I / $\sigma$ I                   | 23.4 (3.4)                 | 22.6 (1.0)                 |
| Completeness (%)                      | 100 (99.9)                 | 97.2 (90.0)                |
| Redundancy                            | 8.0 (7.9)                  | 3.3 (2.8)                  |
| <b>Structure Refinement</b>           |                            |                            |
| No. Reflections                       | 23276                      | 49755                      |
| R <sub>work</sub> / R <sub>free</sub> | 0.1476 / 0.1887            | 0.1372 / 0.1749            |
| R.m.s. deviations                     |                            |                            |
| Bond lengths (%)                      | 0.008                      | 0.008                      |
| Bond angles (°)                       | 0.905                      | 1.063                      |
| Ramachandran                          |                            |                            |
| Preferred regions (%)                 | 95.38                      | 95.67                      |
| Allowed regions (%)                   | 4.62                       | 4.33                       |
| Disallowed regions (%)                | 0                          | 0                          |

Related to Figures 5 and 6. Last resolution shell numbers are in parentheses.

**Figure S1. Compound 1 LCMS Trace**

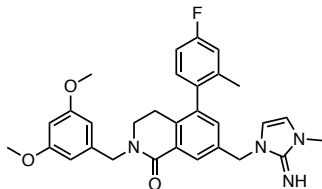

**1**

Chemical Formula:  $C_{30}H_{31}FN_4O_3$

Exact Mass: 514.24

Molecular Weight: 514.60

**LCMS Method 2:** Phenomenex Kinetex 2.6  $\mu$ m XB-C18 100 Å, LC column (50 mm  $\times$  2.1 mm); 2 min gradient, 5 – 95% MeCN:H<sub>2</sub>O, and 0.1% TFA acid.

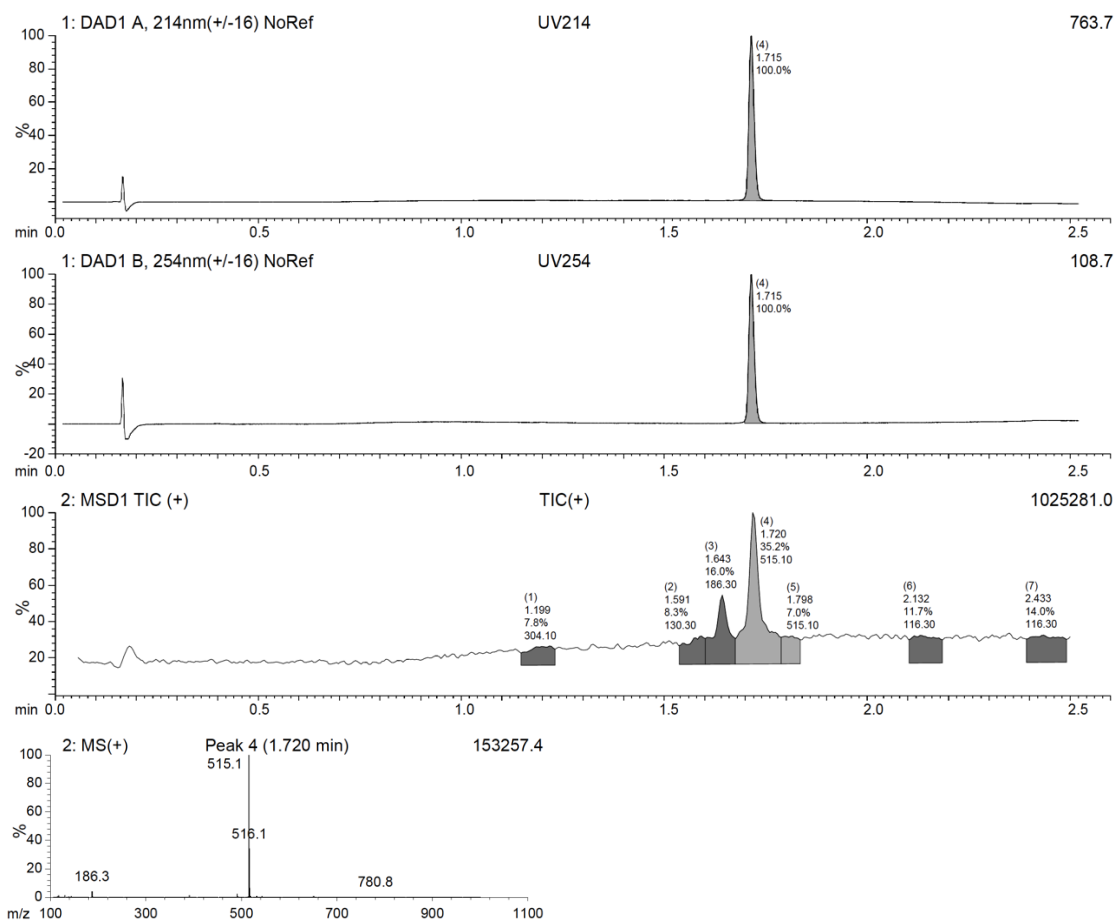

**Figure S2. Compound 34 LCMS Trace**

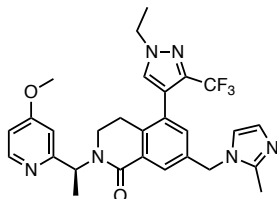

**34**

Chemical Formula:  $C_{28}H_{29}F_3N_6O_2$

Exact Mass: 538.23

Molecular Weight: 538.58

**LCMS Method 2:** Phenomenex Kinetex 2.6  $\mu$ m XB-C18 100 Å, LC column (50 mm  $\times$  2.1 mm); 2 min gradient, 5 – 95% MeCN:H<sub>2</sub>O, and 0.1% TFA acid.

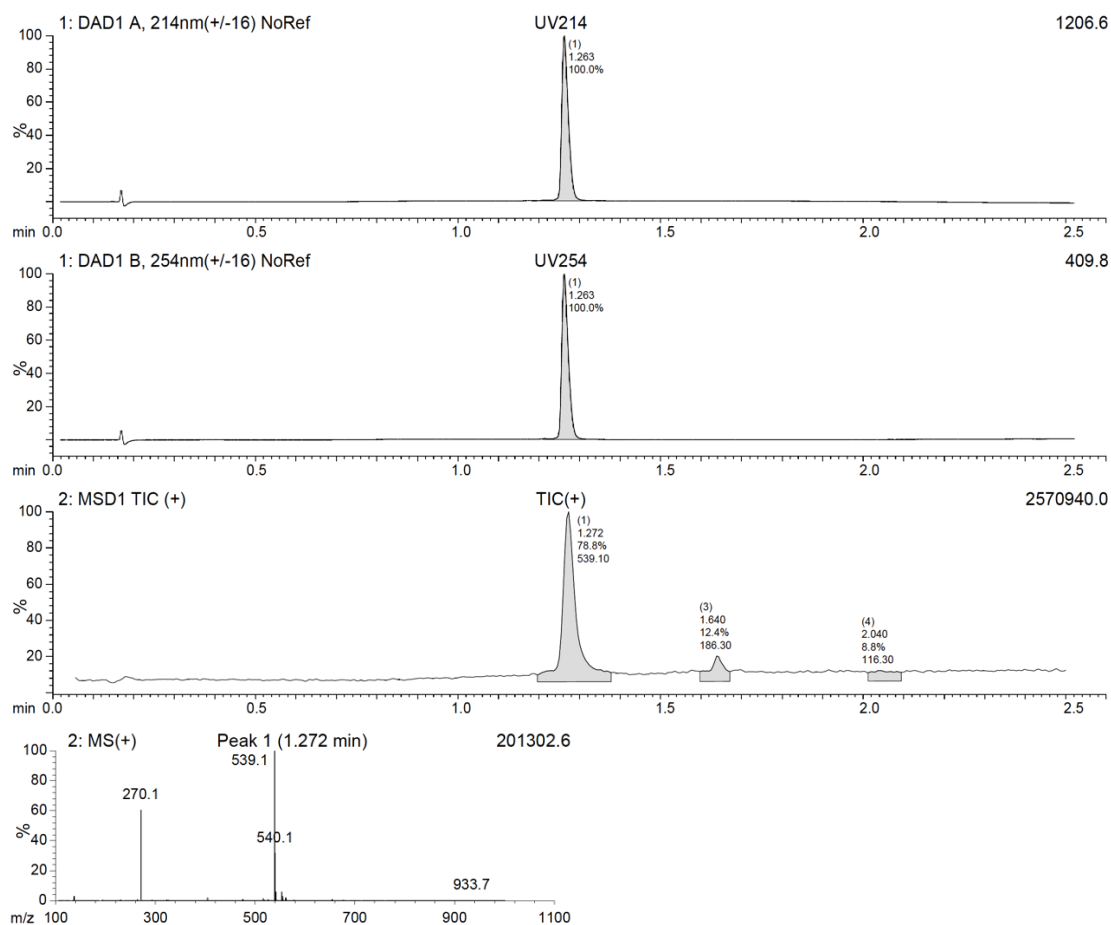

**Figure S3. Compound 36 LCMS Trace**

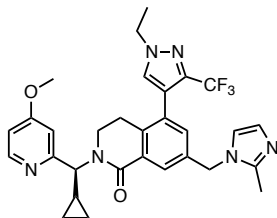

**36**

Chemical Formula:  $C_{30}H_{31}F_3N_6O_2$

Exact Mass: 564.25

Molecular Weight: 564.61

**LCMS Method 2:** Phenomenex Kinetex 2.6  $\mu$ m XB-C18 100 Å, LC column (50 mm  $\times$  2.1 mm); 2 min gradient, 5 – 95% MeCN:H<sub>2</sub>O, and 0.1% TFA acid.

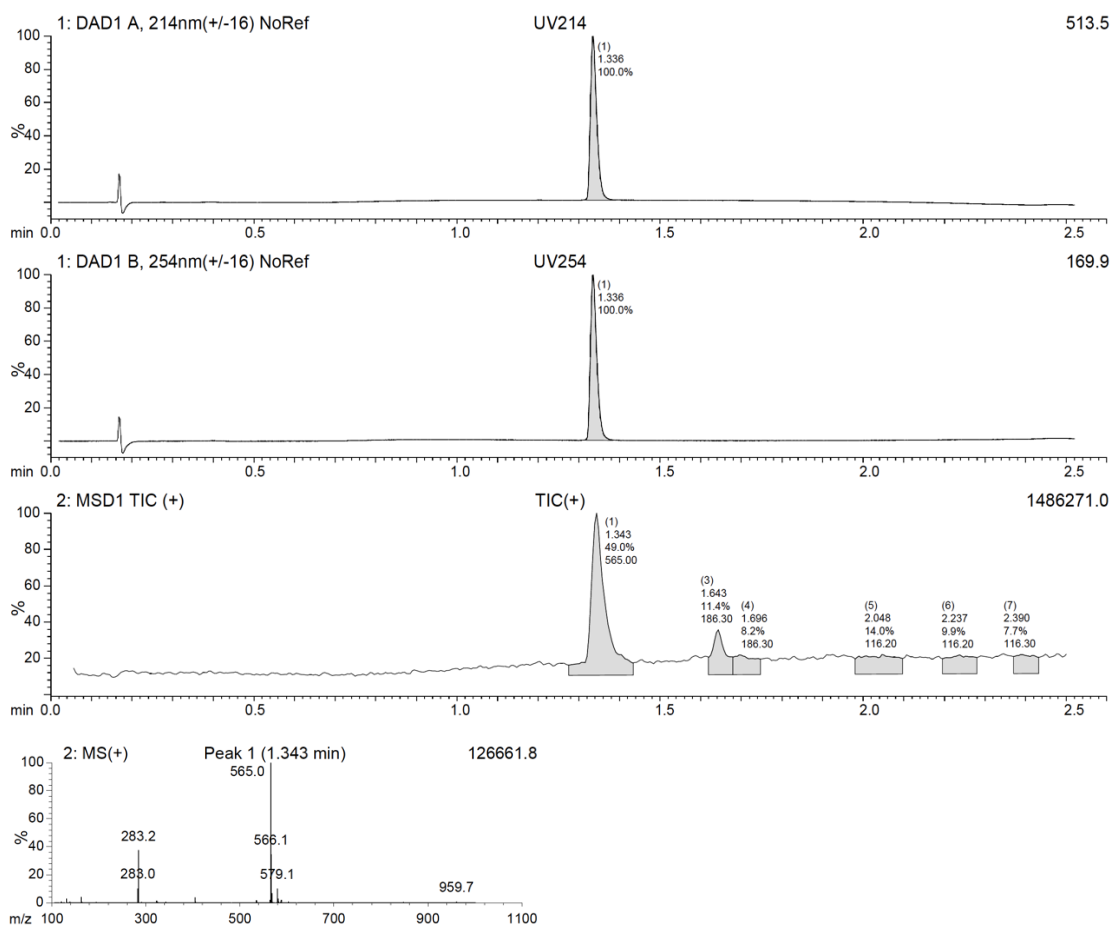

**Figure S4. Compound 37 LCMS Trace**

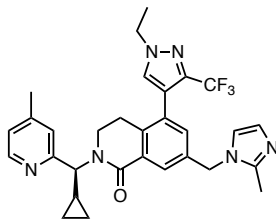

**37**

Chemical Formula: C<sub>30</sub>H<sub>31</sub>F<sub>3</sub>N<sub>6</sub>O

Exact Mass: 548.25

Molecular Weight: 548.61

**LCMS Method 2:** Phenomenex Kinetex 2.6 μm XB-C18 100 Å, LC column (50 mm × 2.1 mm); 2 min gradient, 5 – 95% MeCN:H<sub>2</sub>O, and 0.1% TFA acid.

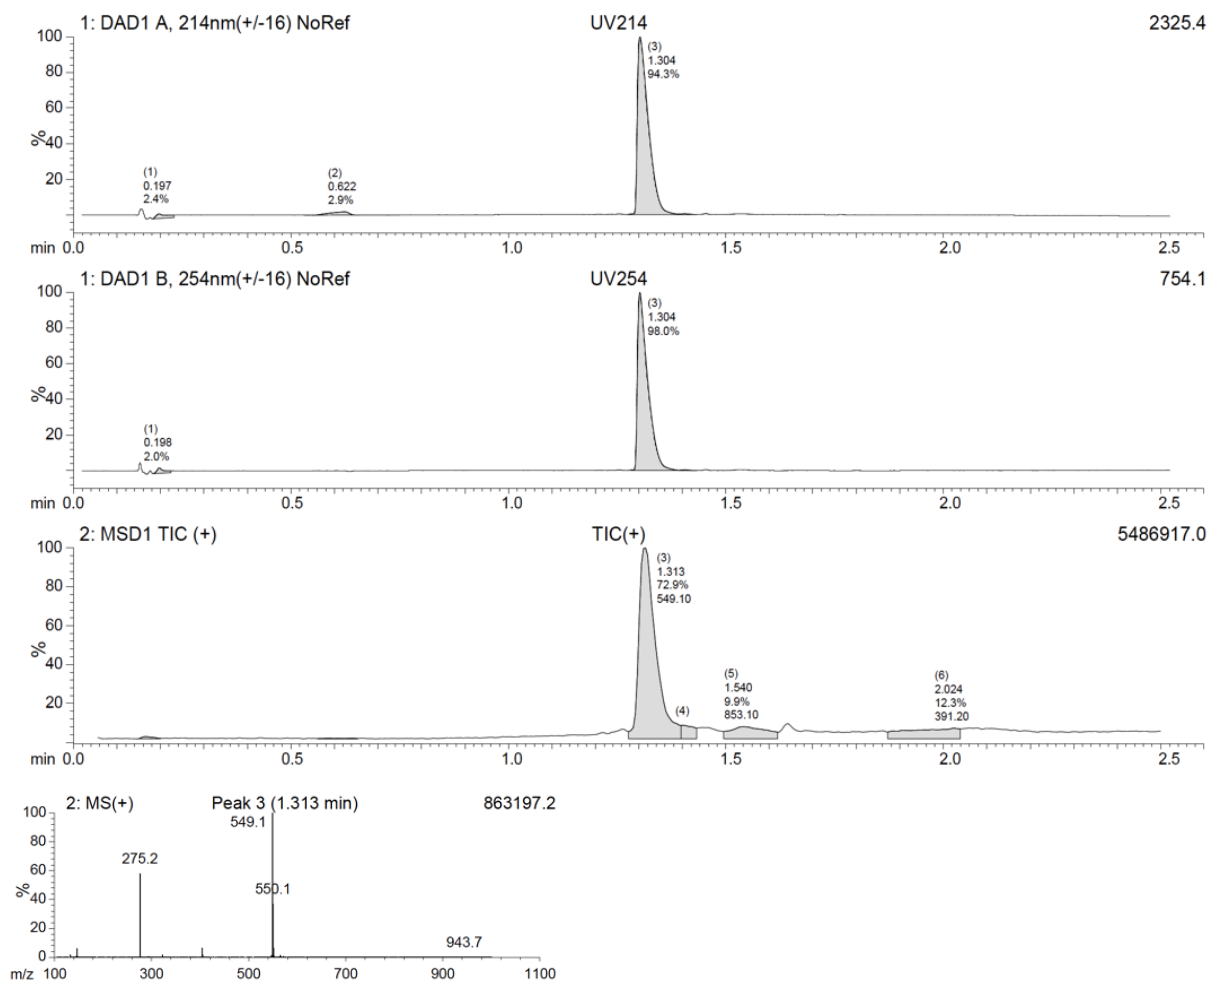

**Figure S5. Compound 38 LCMS Trace**

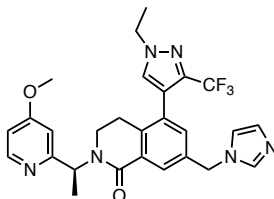

**38**

Chemical Formula:  $C_{27}H_{27}F_3N_6O_2$

Exact Mass: 524.21

Molecular Weight: 524.55

**LCMS Method 2:** Phenomenex Kinetex 2.6  $\mu$ m XB-C18 100 Å, LC column (50 mm  $\times$  2.1 mm); 2 min gradient, 5 – 95% MeCN:H<sub>2</sub>O, and 0.1% TFA acid.

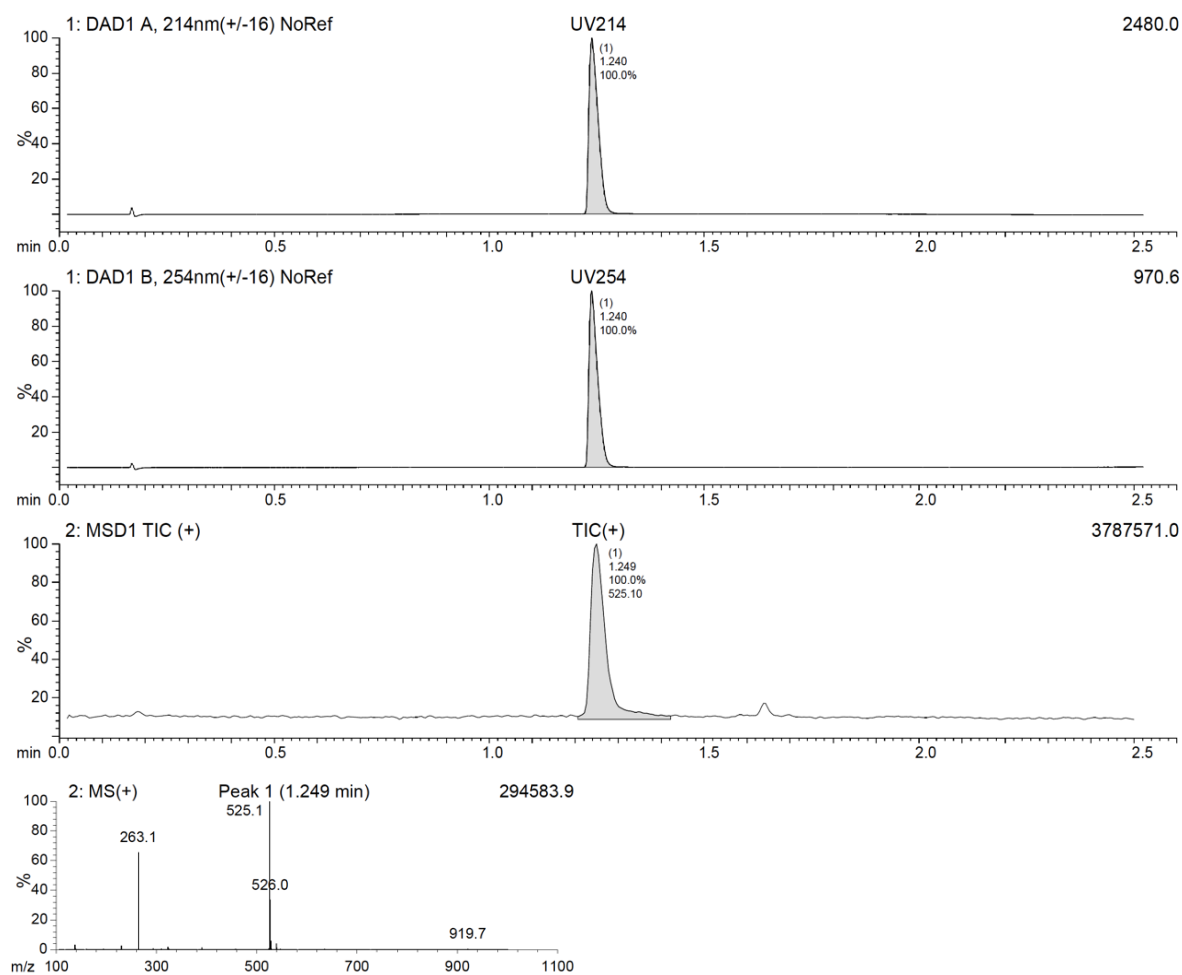

**Figure S6. Compound 40 LCMS Trace**

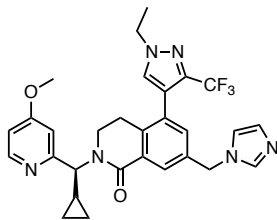

**40**

Chemical Formula:  $C_{29}H_{29}F_3N_6O_2$

Exact Mass: 550.23

Molecular Weight: 550.59

**LCMS Method 2:** Phenomenex Kinetex 2.6  $\mu$ m XB-C18 100 Å, LC column (50 mm  $\times$  2.1 mm); 2 min gradient, 5 – 95% MeCN:H<sub>2</sub>O, and 0.1% TFA acid.

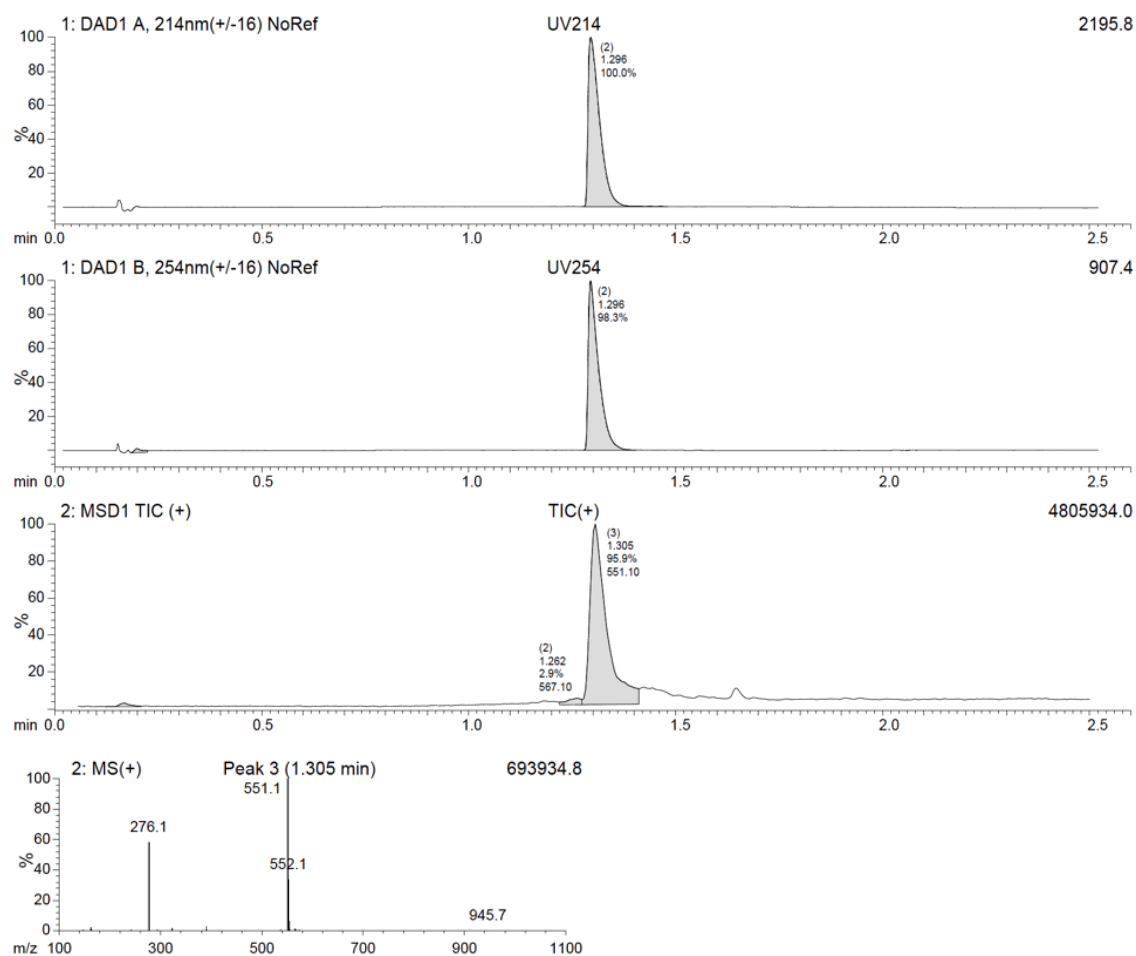

**Figure S7. Compound 41 LCMS Trace**

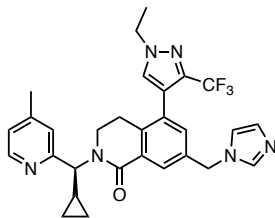

**41**

Chemical Formula: C<sub>29</sub>H<sub>29</sub>F<sub>3</sub>N<sub>6</sub>O

Exact Mass: 534.24

Molecular Weight: 534.59

**LCMS Method 2:** Phenomenex Kinetex 2.6  $\mu$ m XB-C18 100 Å, LC column (50 mm  $\times$  2.1 mm); 2 min gradient, 5 – 95% MeCN:H<sub>2</sub>O, and 0.1% TFA acid.

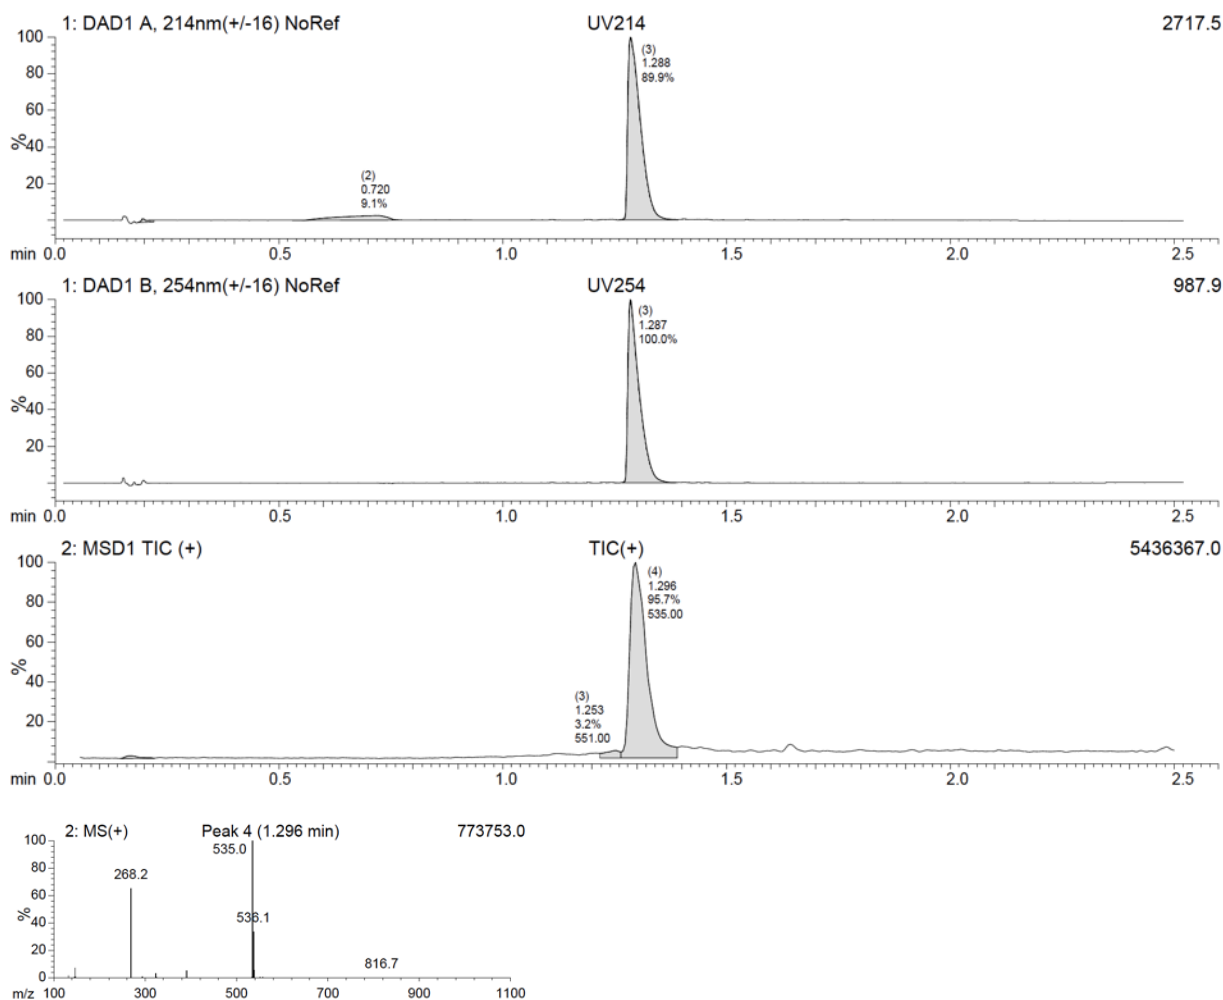

## References

- (1) Tian, J.; Teuscher, K. B.; Aho, E. R.; Alvarado, J. R.; Mills, J. J.; Meyers, K. M.; Gogliotti, R. D.; Han, C.; Macdonald, J. D.; Sai, J.; Shaw, J. G.; Sensintaffar, J. L.; Zhao, B.; Rietz, T. A.; Thomas, L. R.; Payne, W. G.; Moore, W. J.; Stott, G. M.; Kondo, J.; Inoue, M.; Coffey, R. J.; Tansey, W. P.; Stauffer, S. R.; Lee, T.; Fesik, S. W. Discovery and structure-based optimization of potent and selective WD repeat domain 5 (WDR5) inhibitors containing a dihydroisoquinolinone bicyclic core. *J. Med. Chem.* **2020**, *63* (2), 656 – 675.
